# Supplementary material for: Effect of salt seed particle surface area, composition and phase on secondary organic aerosol mass yields in oxidation flow reactors
Source: Copernicus journal article supplement (doi:10.5194/acp-19-2701-2019), 2019-03-01
Supplement: Supplementary file 1 [file acp-19-2701-2019-supplement.pdf]

Supplement of Atmos. Chem. Phys., 19, 2701–2712, 2019  
<https://doi.org/10.5194/acp-19-2701-2019-supplement>  
© Author(s) 2019. This work is distributed under  
the Creative Commons Attribution 4.0 License.

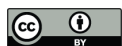

*Supplement of*

## **Effect of salt seed particle surface area, composition and phase on secondary organic aerosol mass yields in oxidation flow reactors**

**Erik Ahlberg et al.**

*Correspondence to:* Erik Ahlberg (erik.ahlberg@nuclear.lu.se)

The copyright of individual parts of the supplement might differ from the CC BY 4.0 License.

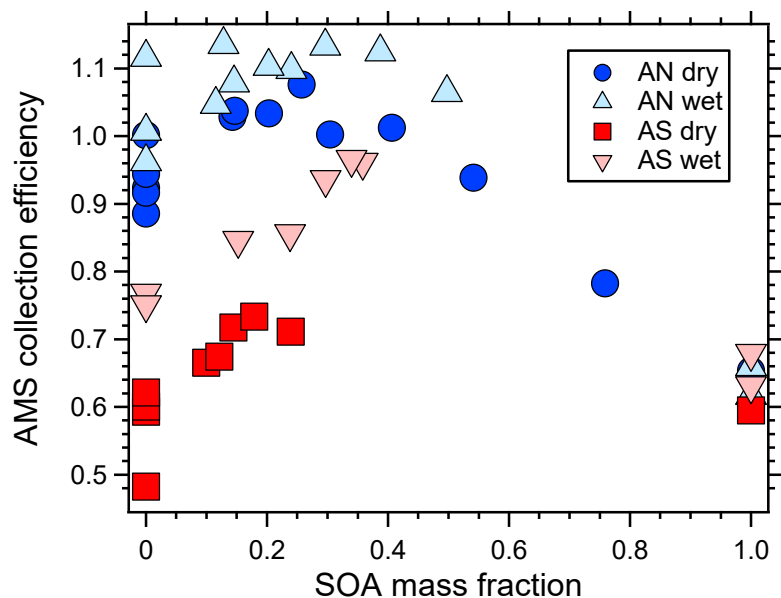

Figure S1. Collection efficiency (CE) of the AMS as a function of SOA mass fraction, calculated using the mixture density and SMPS volume concentration. The collection efficiency of ammonium sulphate increases up to a mass fraction of ~0.4. Above 0.4 the CE of ammonium nitrate seems to decrease. This is most likely due to the formation of pure SOA particles. Nucleated SOA particles are smaller and have a lower CE.

5

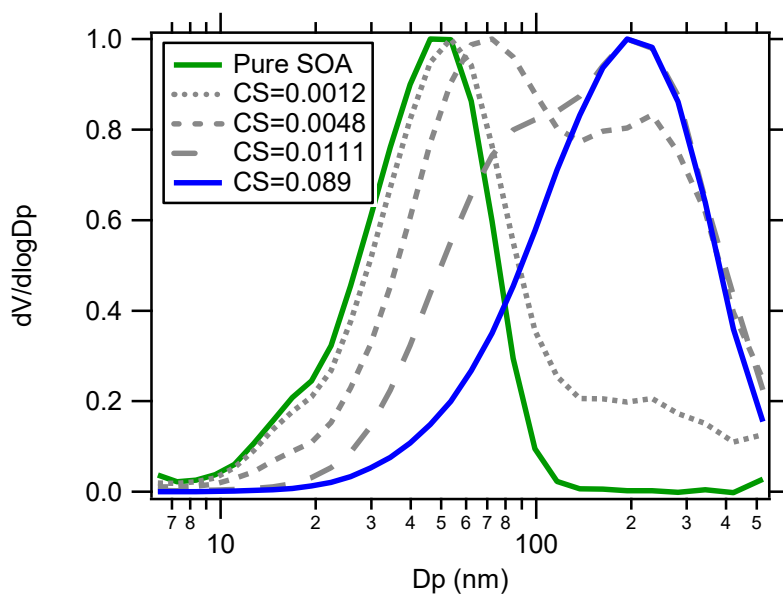

Figure S2. Example of how the volume size distribution changed during an experiment, from purely nucleated particles consisting of only SOA, through a mixture of nucleated and seed particles, to purely seed particles with condensed organics. Y axis is normalized so the differences in  $D_p$  are more clear.

10
